# Supplementary material for: Strong impact of sulfotransferases on DNA adduct formation by 4‐aminobiphenyl in bladder and liver in mice
Source: PubMed Central journal article supplement (PMC6246946; doi:10.1002/cam4.1779), 2018-10-10

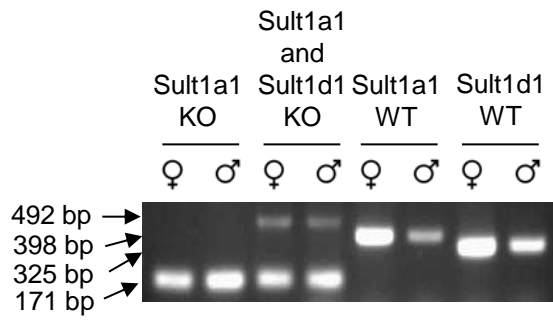

Supplement: CAM4-7-5604-s003.pdf [file CAM4-7-5604-s003.pdf]
